# Supplementary material for: Well-dispersed Ni3Fe nanoparticles with a N-doped porous carbon shell for highly efficient rechargeable Zn–air batteries
Source: Royal Society of Chemistry journal article supplement (doi:10.1039/d2nr05827h), 2022-11-15
Supplement: d2nr05827h1.pdf [file d2nr05827h1.pdf]

## Supporting Information

### Well-dispersed Ni<sub>3</sub>Fe nanoparticles with N-doped porous carbon shell for highly efficient rechargeable Zn-air batteries

Yuemei Liu <sup>a</sup>, Junhong Ma <sup>a, \*</sup>, Tuan K.A. Hoang <sup>b</sup>, Lijing Yang <sup>a</sup>, and Zhaohui Chen <sup>a</sup>

<sup>a</sup> State Key Laboratory of Chemistry and Utilization of Carbon-Based Energy Resources; School of Chemical Engineering and Technology, Xinjiang University, Urumqi, 830017, PR China

<sup>b</sup> Hydro-Québec Research Institute, 1806 Boulevard Lionel-Boulet, Varennes, QC J3X 1S1, Canada

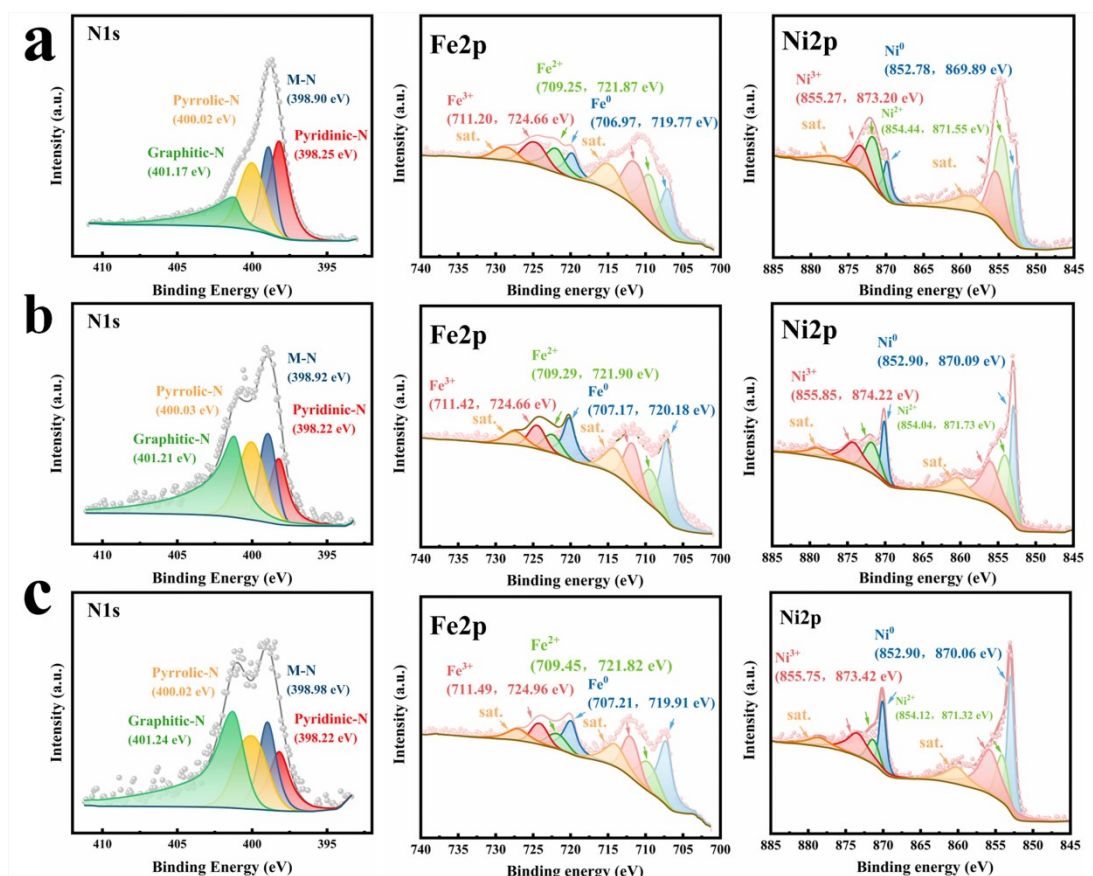

Fig. S1 XPS spectra of N1s, Fe2p, Ni2p for (a) Ni<sub>3</sub>Fe@NC-500, (b) Ni<sub>3</sub>Fe@NC-700, (c) Ni<sub>3</sub>Fe@NC-

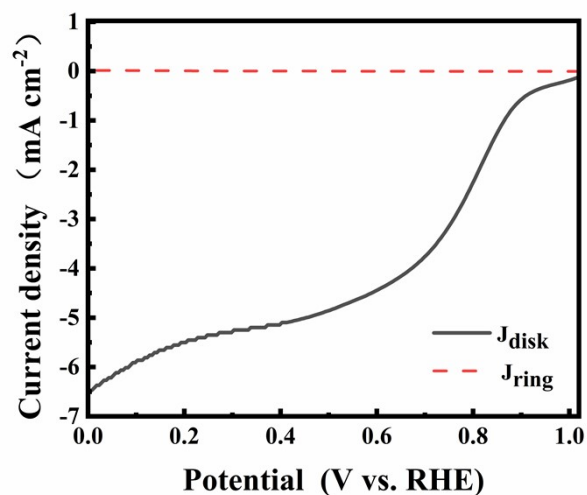

Fig. S2 RRDE voltammogram of Ni<sub>3</sub>Fe@NC-600 in O<sub>2</sub>-saturated 0.1 M KOH at 1600 rpm.

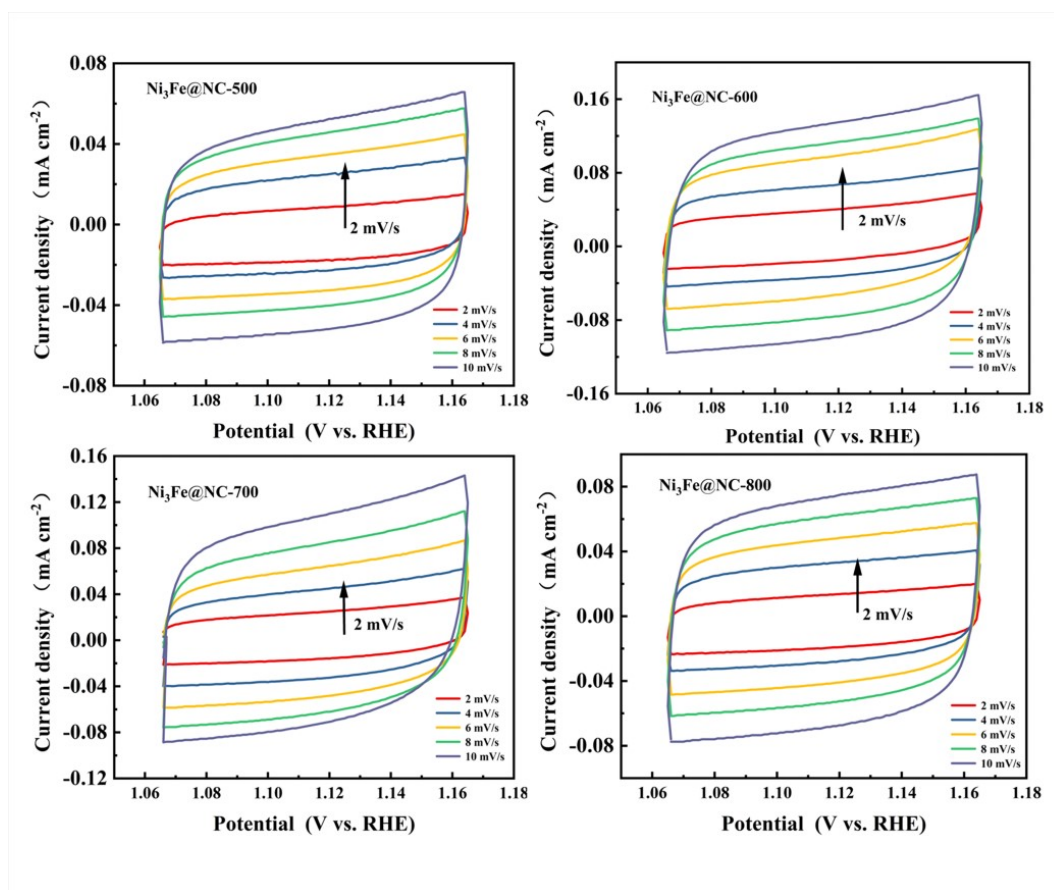

Fig. S3 The CV curves of Ni<sub>3</sub>Fe@NC series samples with scan rates from 2 mV s<sup>-1</sup> to 10 mV s<sup>-1</sup> in 0.1

M KOH.

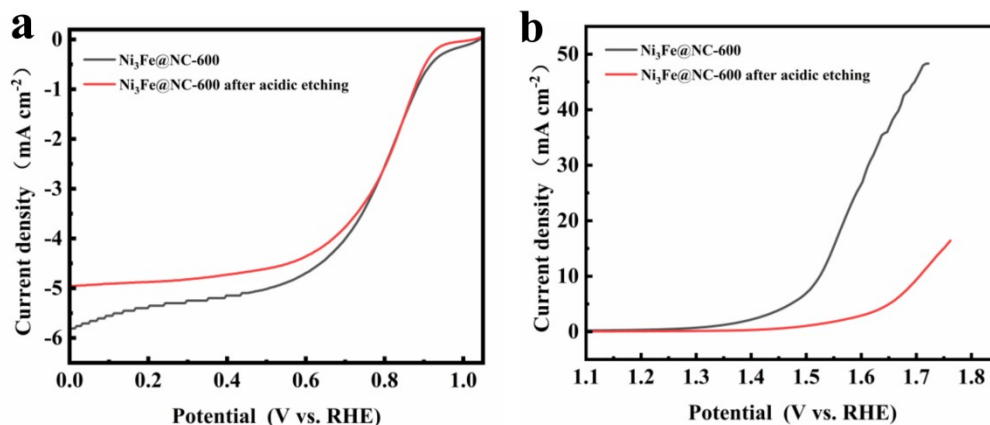

**Fig. S4** (a) ORR performances and (b) OER performances of the Ni<sub>3</sub>Fe@NC-600 before and after acidic etching.

**Table S1** Atomic percentages of C, N, O, Fe, and Ni, and relative surface concentration of nitrogen species obtained from XPS.

| Sample                    | C1s     | N1s     | O1s    | Fe2p   | Ni2p   | Pyridinic-N | M-N     | Pyrrolic-N | Graphitic-N |
|---------------------------|---------|---------|--------|--------|--------|-------------|---------|------------|-------------|
| Ni <sub>3</sub> Fe@NC-500 | 68.07 % | 18.95 % | 6.75 % | 3.76 % | 2.47 % | 32.87 %     | 20.04 % | 26.50 %    | 20.59 %     |
| Ni <sub>3</sub> Fe@NC-600 | 79.25 % | 9.10 %  | 6.35 % | 2.71 % | 2.60 % | 22.70 %     | 26.39 % | 25.96 %    | 24.95 %     |
| Ni <sub>3</sub> Fe@NC-700 | 83.29 % | 5.80 %  | 6.20 % | 2.25 % | 2.46 % | 19.51 %     | 19.29 % | 24.81 %    | 36.39 %     |
| Ni <sub>3</sub> Fe@NC-800 | 84.49 % | 3.69 %  | 6.47 % | 2.50 % | 2.85 % | 17.80 %     | 18.49 % | 25.58 %    | 38.13 %     |

**Table S2** Surface relative content of Fe in different valence states in Fe2p energy spectrum and surface relative content of Ni in different valence states in the Ni2p energy spectrum for each sample.

| Sample                    | Fe <sup>0</sup> | Fe <sup>2+</sup> | Fe <sup>3+</sup> | Ni <sup>0</sup> | Ni <sup>2+</sup> | Ni <sup>3+</sup> |
|---------------------------|-----------------|------------------|------------------|-----------------|------------------|------------------|
| Ni <sub>3</sub> Fe@NC-500 | 27.37 %         | 36.28 %          | 36.35 %          | 24.92 %         | 46.33 %          | 28.75 %          |
| Ni <sub>3</sub> Fe@NC-600 | 35.73 %         | 28.68 %          | 35.59 %          | 26.59 %         | 31.11 %          | 42.30 %          |
| Ni <sub>3</sub> Fe@NC-700 | 41.10 %         | 26.44 %          | 32.46 %          | 28.60%          | 30.31 %          | 41.09 %          |
| Ni <sub>3</sub> Fe@NC-800 | 47.62 %         | 24.08 %          | 28.30 %          | 36.58 %         | 22.51 %          | 40.91 %          |

**Table S3** Structural parameters of different samples.

| Sample                    | SBET <sup>a</sup><br>(m <sup>2</sup> g <sup>-1</sup> ) | VT <sup>b</sup><br>(cm <sup>3</sup> g <sup>-1</sup> ) | Vmicro <sup>c</sup><br>(cm <sup>3</sup> g <sup>-1</sup> ) | Vmeso <sup>d</sup><br>(cm <sup>3</sup> g <sup>-1</sup> ) | Dap <sup>e</sup><br>(nm) |
|---------------------------|--------------------------------------------------------|-------------------------------------------------------|-----------------------------------------------------------|----------------------------------------------------------|--------------------------|
| Ni <sub>3</sub> Fe@NC-500 | 50.06                                                  | 0.14                                                  | 0.002                                                     | 0.14                                                     | 12.65                    |
| Ni <sub>3</sub> Fe@NC-600 | 51.41                                                  | 0.22                                                  | 0.008                                                     | 0.21                                                     | 18.47                    |
| Ni <sub>3</sub> Fe@NC-700 | 50.87                                                  | 0.29                                                  | 0.006                                                     | 0.28                                                     | 24.70                    |
| Ni <sub>3</sub> Fe@NC-800 | 59.01                                                  | 0.28                                                  | 0.008                                                     | 0.27                                                     | 20.36                    |

**Table S4** Comparison of bifunctional ORR/OER catalytic activity of the Ni<sub>3</sub>Fe@NC-600 presented in this work with other well-developed FeNi-based electrocatalysts tested in 0.1 M KOH.

| Materials                              | Loading<br>(mg cm <sup>-2</sup> ) | Eonset<br>(V<br>vs.RHE) | E <sub>1/2</sub><br>(V vs.RHE) | E <sub>j=10</sub><br>(V vs.<br>RHE) | ΔE/V<br>(E <sub>j=10</sub> -<br>E <sub>1/2</sub> ) | RZABs Peak<br>power density<br>(mW cm <sup>-2</sup> ) | Ref.         |
|----------------------------------------|-----------------------------------|-------------------------|--------------------------------|-------------------------------------|----------------------------------------------------|-------------------------------------------------------|--------------|
| NiFe-LDH                               | 1                                 | /                       | 0.862                          | 1.57                                | 0.71                                               | 97                                                    | 1            |
| TA-NiFe@NCNT                           | 0.24                              | 0.93                    | 0.81                           | 1.54                                | 0.73                                               | /                                                     | 2            |
| NiFe/N-CNT                             | 0.4                               | /                       | 0.75                           | 1.52                                | 0.77                                               | 300.7                                                 | 3            |
| NiFeMo@N-rGO                           | 0.4                               | /                       | 0.82                           | 1.56                                | 0.73                                               | 120                                                   | 4            |
| NiFe LDH@Fe-<br>N-CNFs                 | 0.3                               | 0.99                    | 0.8                            | 1.58                                | 0.86                                               | 157.6                                                 | 5            |
| NiFe-ND/FeCo-<br>NC                    | 0.2                               | 0.93                    | 0.85                           | 1.66                                | 0.81                                               | 121.1                                                 | 6            |
| NiFe@N-CFs                             | /                                 | 0.94                    | 0.82                           | 1.53                                | 0.71                                               | 102                                                   | 7            |
| NiFe@NC                                | 0.5                               | /                       | 0.86                           | 1.51                                | 0.65                                               | 159.8                                                 | 8            |
| Fe <sub>3</sub> Pt/Ni <sub>3</sub> FeN | 0.12                              | /                       | 0.93                           | 1.6                                 | 0.67                                               | /                                                     | 9            |
| FeNi-NCS-2                             | 0.2                               | /                       | 0.87                           | 1.63                                | 0.76                                               | 109.8                                                 | 10           |
| Ni <sub>3</sub> Fe@NC-600              | 0.25                              | 1.01                    | 0.79                           | 1.52                                | 0.73                                               | 175                                                   | this<br>work |

**References**

- 1 W. Wang, Y. Liu, J. Li, J. Luo, L. Fu and S. Chen, *J Mater Chem A Mater*, 2018, **6**, 14299–14306.
- 2 X. Xie, L. Shang, R. Shi, G. I. N. Waterhouse, J. Zhao and T. Zhang, *Nanoscale*, 2020, **12**, 13129–13136.
- 3 H. Lei, Z. Wang, F. Yang, X. Huang, J. Liu, Y. Liang, J. Xie, M. S. Javed, X. Lu, S. Tan and W. Mai, *Nano Energy*, 2019, **68**, 104293.
- 4 W. Zeng, C. Wei, K. Zeng, X. Cao, M. H. Rummeli and R. Yang, *ChemElectroChem*, 2021, **8**, 524–531.
- 5 D. Wu, X. Hu, Z. Yang, T. Yang, J. Wen, G. Lu, Q. Zhao, Z. Li, X. Jiang and C. Xu, *Ind Eng Chem Res*, 2022, **61**, 1c04694.
- 6 Y. Wang, G. Zhang, M. Ma, Y. Ma, J. Huang, C. Chen, Y. Zhang, X. Sun and Z. Yan, *Sci China Mater*, 2020, **63**, 1182–1195.
- 7 Y. Niu, X. Teng, S. Gong and Z. Chen, *J Mater Chem A Mater*, 2020, **8**, 13725–13734.
- 8 X. Zhang, J. Wang, C. Dai, X. Jin, Y. Zhao and L. Qu, *J Power Sources*, 2022, **538**, 231563.
- 9 Z. Cui, G. Fu, Y. Li and J. B. Goodenough, *Angewandte Chemie*, 2017, **129**, 10033–10037.
- 10 Z. Yao, D. Chen, Y. Li, Q. Lyu, J. Wang and Q. Zhong, *Int J Hydrogen Energy*, 2022, **47**, 984–992.
